# Supplementary material for: Gene correction for SCID-X1 in long-term hematopoietic stem cells
Source: PubMed Central journal article supplement (PMC6456568; doi:10.1038/s41467-019-09614-y), 2019-04-09
Supplement: 41467_2019_9614_MOESM1_ESM.pdf [file 41467_2019_9614_MOESM1_ESM.pdf]

## Supplementary Figures

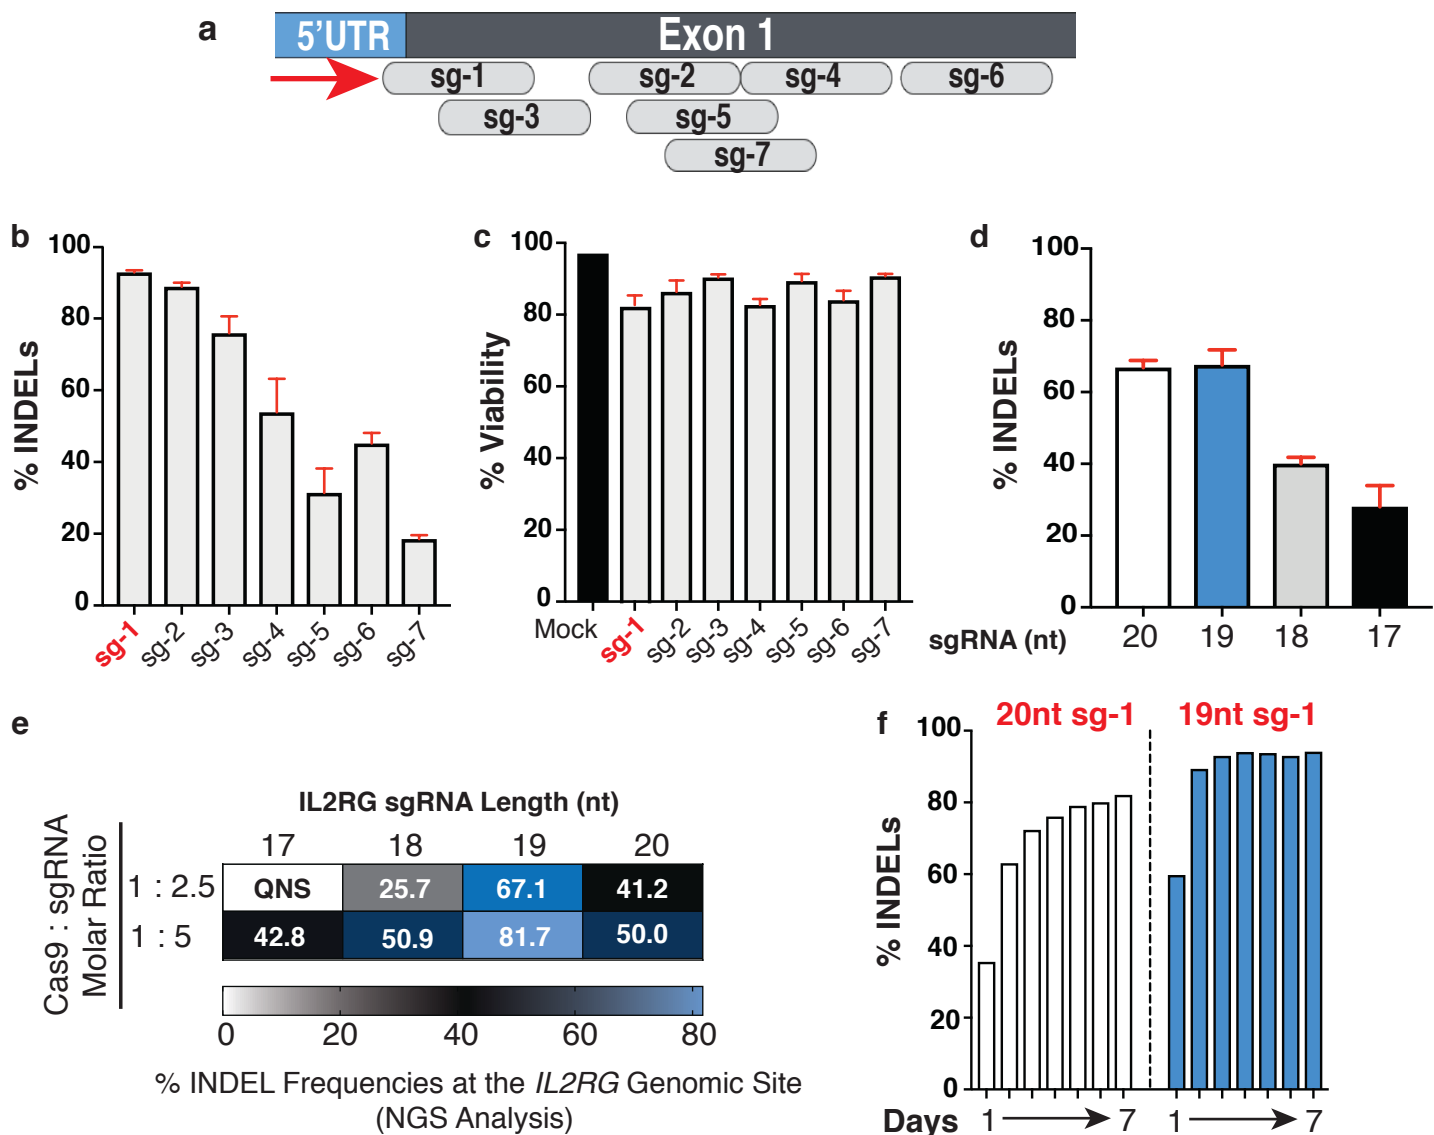

**Supplementary Figure 1.** Screening and characterization of *IL2RG* sgRNA guides. **(a)** Schematic of *IL2RG* sgRNAs for exon 1. **(b)** Percent INDELS and **(c)** Percent viability at day 4 for *IL2RG* sgRNAs 1-7 nucleofected as RNP in UCB derived CD34<sup>+</sup> HSPCs (n =1). **(d)** Comparing percent INDELS of WT (20nt) sg-1 *IL2RG* sgRNA to truncated versions (19nt, 18nt and 17nt) at 1:2.5 molar ratio (n = 2). **(e)** Next generation sequencing (NGS) analysis of samples from **d** (n =1). **(f)** Time course of percent INDELS generated by WT sg-1 *IL2RG* sgRNA (white bars) and 19nt truncated *IL2RG* sgRNA (blue bars) (shown n=1). UCB, umbilical cord blood. Mean  $\pm$  s.e.m

Supplementary Figures

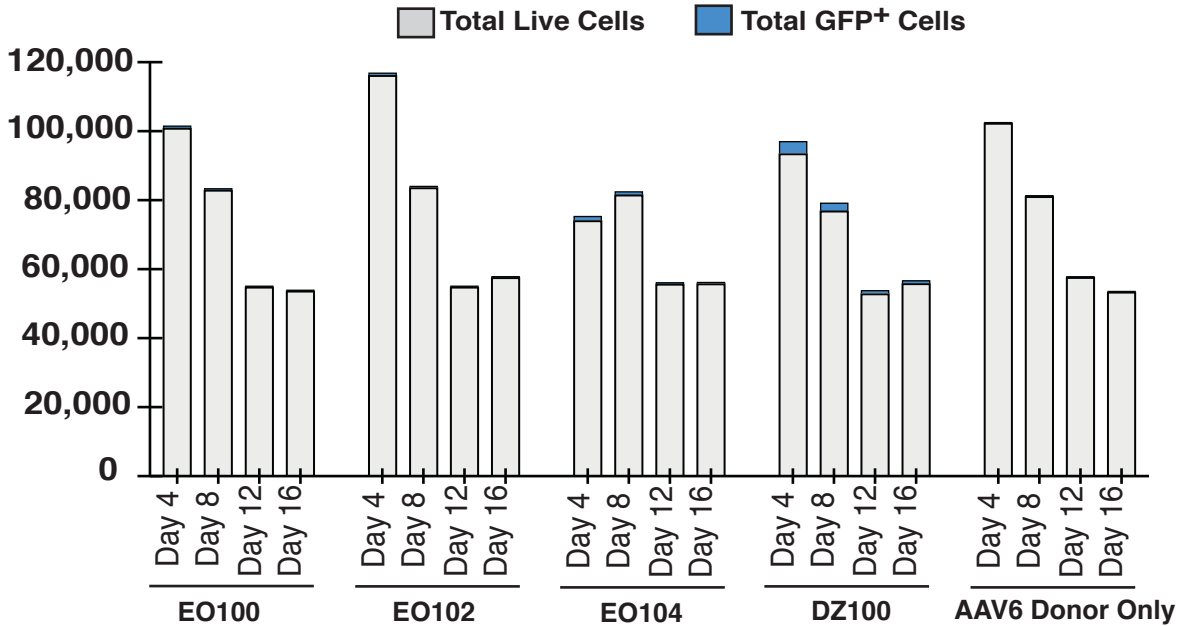

| Nucleofection Programs  |                  | EO100            |                  | EO102            |                  | EO104            |                  | DZ100            |                  | AAV6 Donor Only  |  |
|-------------------------|------------------|------------------|------------------|------------------|------------------|------------------|------------------|------------------|------------------|------------------|--|
| Days Post Nucleofection | Total Live Cells | Total GFP+ Cells | Total Live Cells | Total GFP+ Cells | Total Live Cells | Total GFP+ Cells | Total Live Cells | Total GFP+ Cells | Total Live Cells | Total GFP+ Cells |  |
| Day 4                   | 101,001          | 765              | 116,300          | 839              | 74,231           | 1,368            | 93,616           | 3,664            | 102,478          | 65               |  |
| Day 8                   | 83,050           | 528              | 83,755           | 488              | 81,685           | 1,034            | 77,028           | 2,377            | 81,245           | 119              |  |
| Day 12                  | 54,950           | 236              | 54,982           | 215              | 55,818           | 491              | 53,003           | 1,062            | 57,762           | 65               |  |
| Day 16                  | 53,801           | 158              | 57,730           | 186              | 55,935           | 446              | 55,935           | 938              | 53,512           | 54               |  |

**Supplementary Figure 2.** Screening Lonza 4d nucleofection programs in human CD34+ HSPCs. 1x10<sup>5</sup> cord blood derived CD34+ HSPCs nucleofected with RNP at 1: 2.5 molar ratio and transduced with AAV6 donor DNA virus for CCR5 locus at an MOI of 100,000, as determined by q-PCR. Total live cells as determined by trypan blue staining and % GFP+ cells by flow cytometry (FACS).

## Supplementary Figures

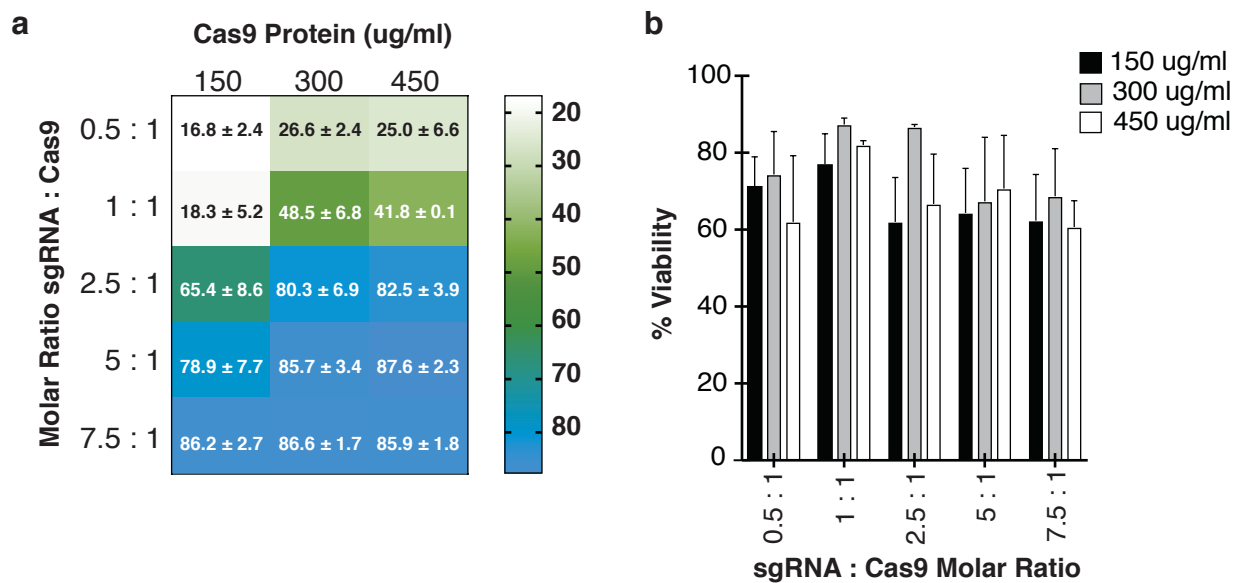

**Supplementary Figure 3.** IL2RG sgRNA: WT Cas9 protein (RNP) molar ratios in mobilized PB CD34<sup>+</sup> HSPCs. **(a)** Heat map of TIDE analysis of various RNP molar ratios as determined at day 4 post genome editing. Shown is percent on target INDELS (n= 3, biological replicates). **(b)** Cellular viability at day 4-post nucleofection of various molar ratio RNPs. Measurement is based on trypan blue staining. Mean ± s.e.m; PB, peripheral blood.

## Supplementary Figures

a

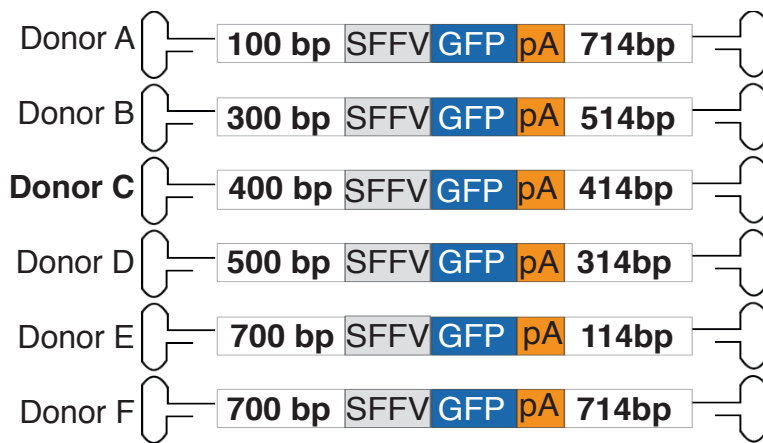

b

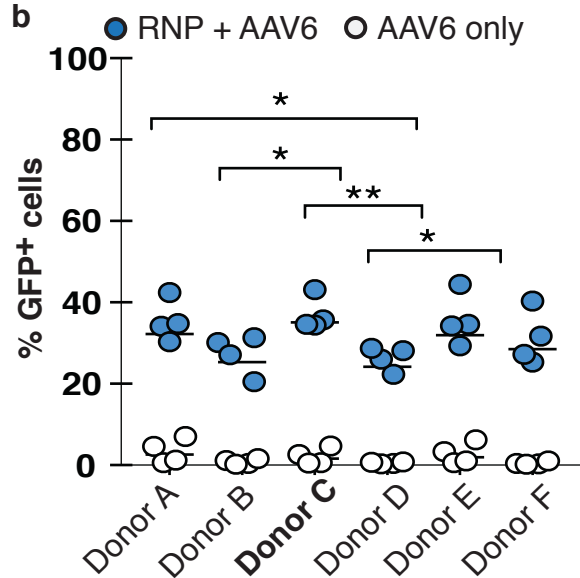

**Supplementary Figure 4.** IL2RG homology arms length characterization. **(a)** Schematics of various symmetric and asymmetric arms of homology flanking a SFFV GFP cassette. **(b)** Targeting integration frequencies (% HR) quantified by FACS analysis. Donor A vs Donor D \*p-value = 0.0204; Donor B vs Donor C \*p-value = 0.0226 ; Donor C vs Donor D \*\*p-value = 0.0055; Donor D vs Donor E \*p-value= 0.0361 (unpaired t-test). Median is shown. CD34<sup>+</sup> HSPCs used in this experiment were derived from two different fresh UCB or mPB donors. n = 4 healthy, male donors. UCB, umbilical cord blood, mPB, mobilized peripheral blood.

# Supplementary Figures

a

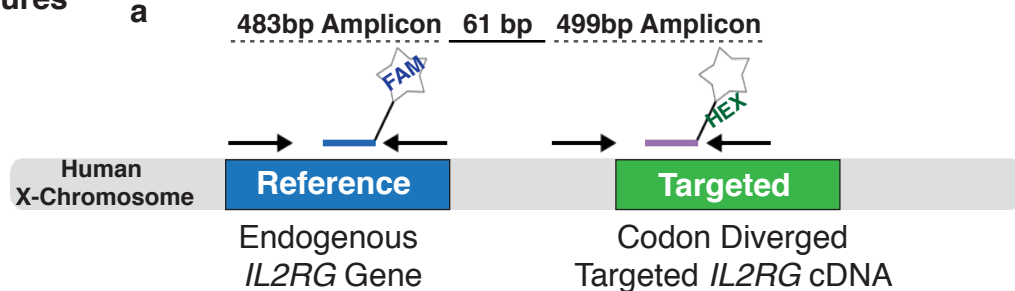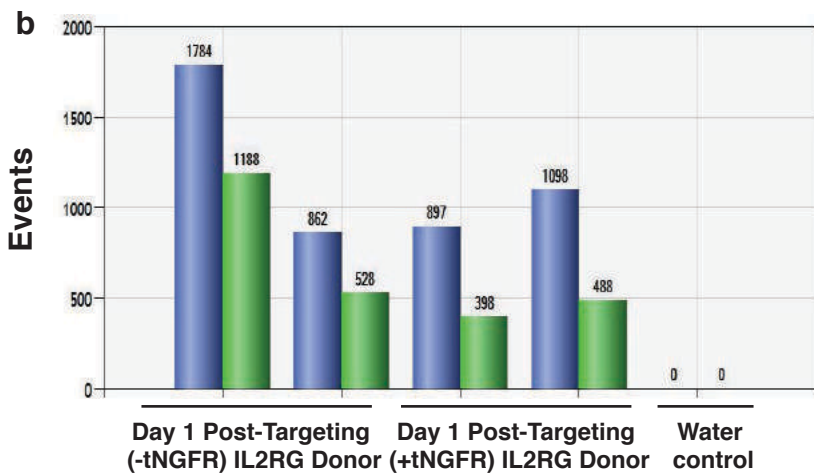

c

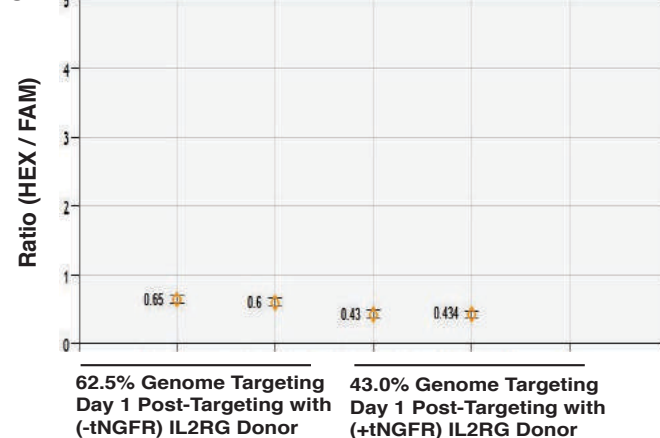

d

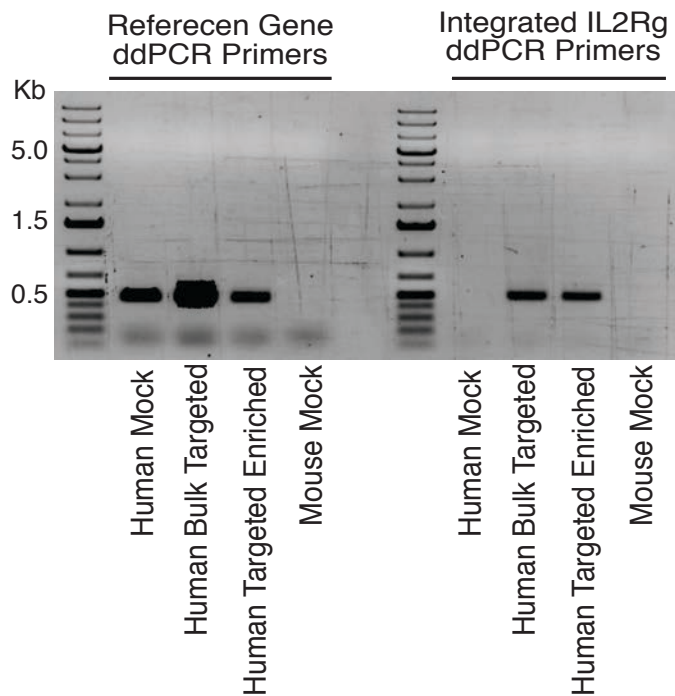

f

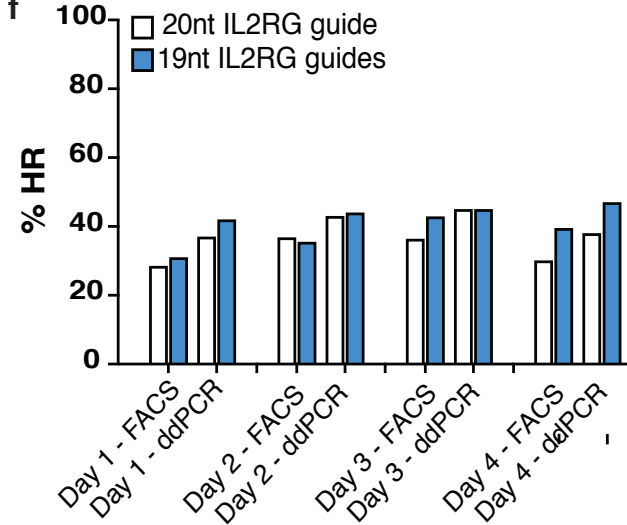

e

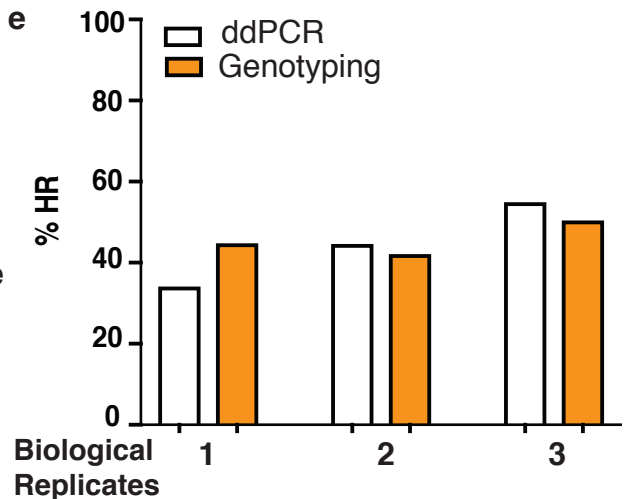

**Supplementary Figure 5.** IL2RG specific digital droplet PCR (ddPCR) assay. (a) Schematic representation of the IL2RG specific ddPCR primers-probe design. (b) Positive droplets generated for the reference (FAM labeled - blue) and integrate (HEX labeled - green) IL2RG PCR amplicons. Genome targeting results using -tNGFR or +tNGFR IL2RG cDNA targeted donors at 24h post rAAV6 transduction. (c) Ratio of integrated (HEX) to reference (FAM). Male derived genomic DNA contains only one allele of the human X-chromosome allowing for the ratio of the fluorescence signal to be a direct measurement of the levels of genome targeting. (d) Specificity of the ddPCR primer-probe set. (e) Comparison of ddPCR analysis of bulk IL2RG cDNA targeted male derived CD34<sup>+</sup> HSPCs and genotype of single cell sorted methylcellulose assay from the bulk population; n = 3 (biological replicates). (f) Comparison of ddPCR and FACS analysis of targeted SFFV-GFP cassette targeted into IL2RG locus of male derived CD34<sup>+</sup> HSPCs. Time course day 1 through 4-post targeting is shown for full length (20nt) and truncated (19nt) IL2RG guide.

## Supplementary Figures

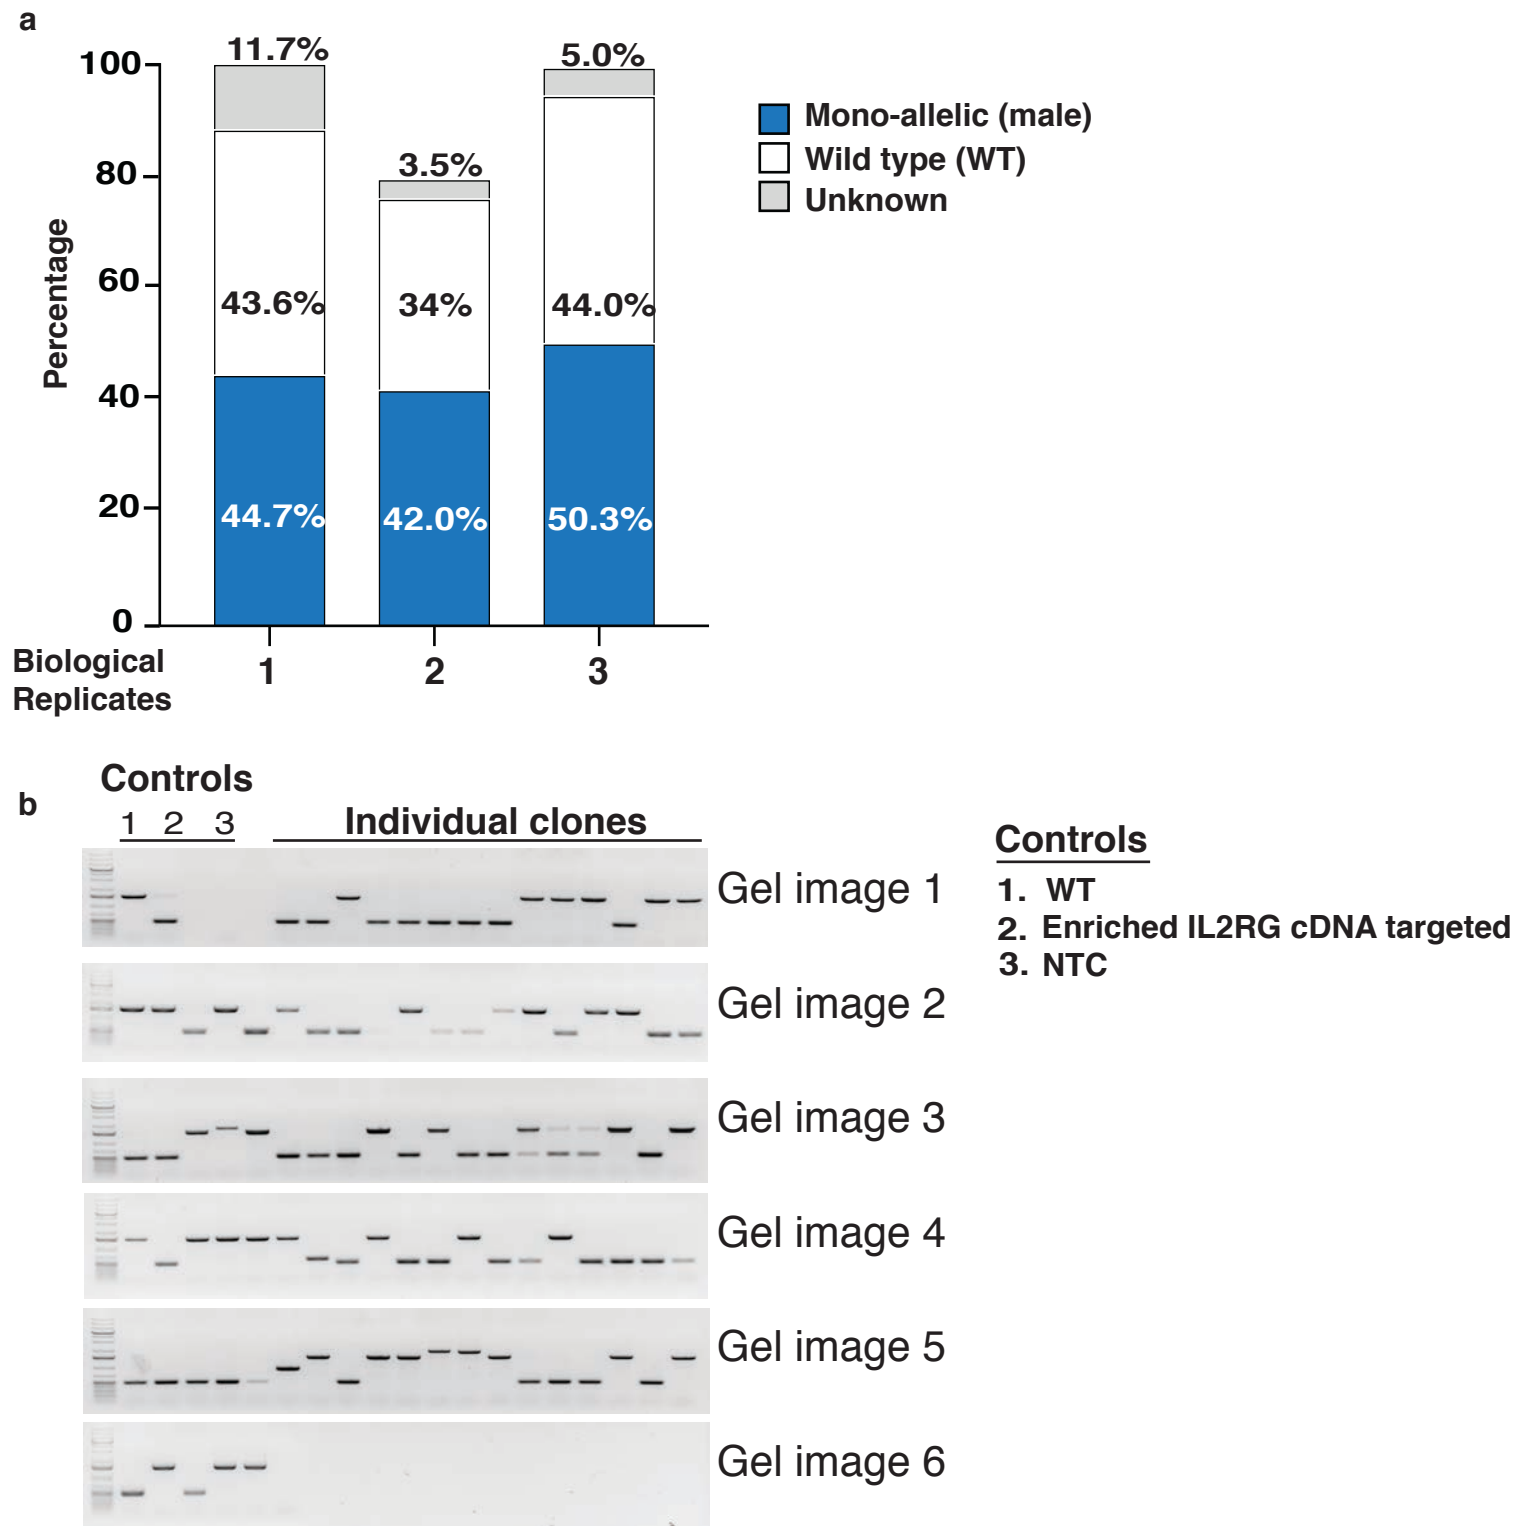

**Supplementary Figure 6.** Methylcellulose derived colonies and genotyping analysis of IL2RG cDNA targeted CD34<sup>+</sup> HSPC single cells. **(a)** Quantification of percent allelic targeting. Genotyping results derived from day 2 post IL2RG genome targeting, n=3 biological replicates, male derived frozen mobilized PB CD34<sup>+</sup> HSPCs. **(b)** Representative genotyping gel images. Colonies obtained at 14 days from individual wells of methylcellulose plates are scored and genotypes using a 3-primer PCR approach. Shown are genotyping results of biological replicate #2 from **(a)**. WT - wild type; NTC - no template control; PB - peripheral blood.

Supplementary Figures

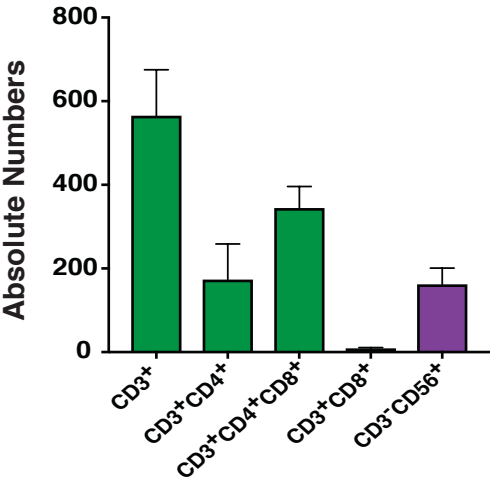

**Supplementary Figure 7.** In vitro IL2RG gene correction of SCID-X1 derived CD34<sup>+</sup> HSPCs. Shown are absolute numbers of pre-T cells, T-cells and NK cells derived at week one following induction of delta like 1 ligand (dll1) using doxycycline, from **Figure 1e**. n = 23 wells, mean ± s.e.m.

Supplementary Figures

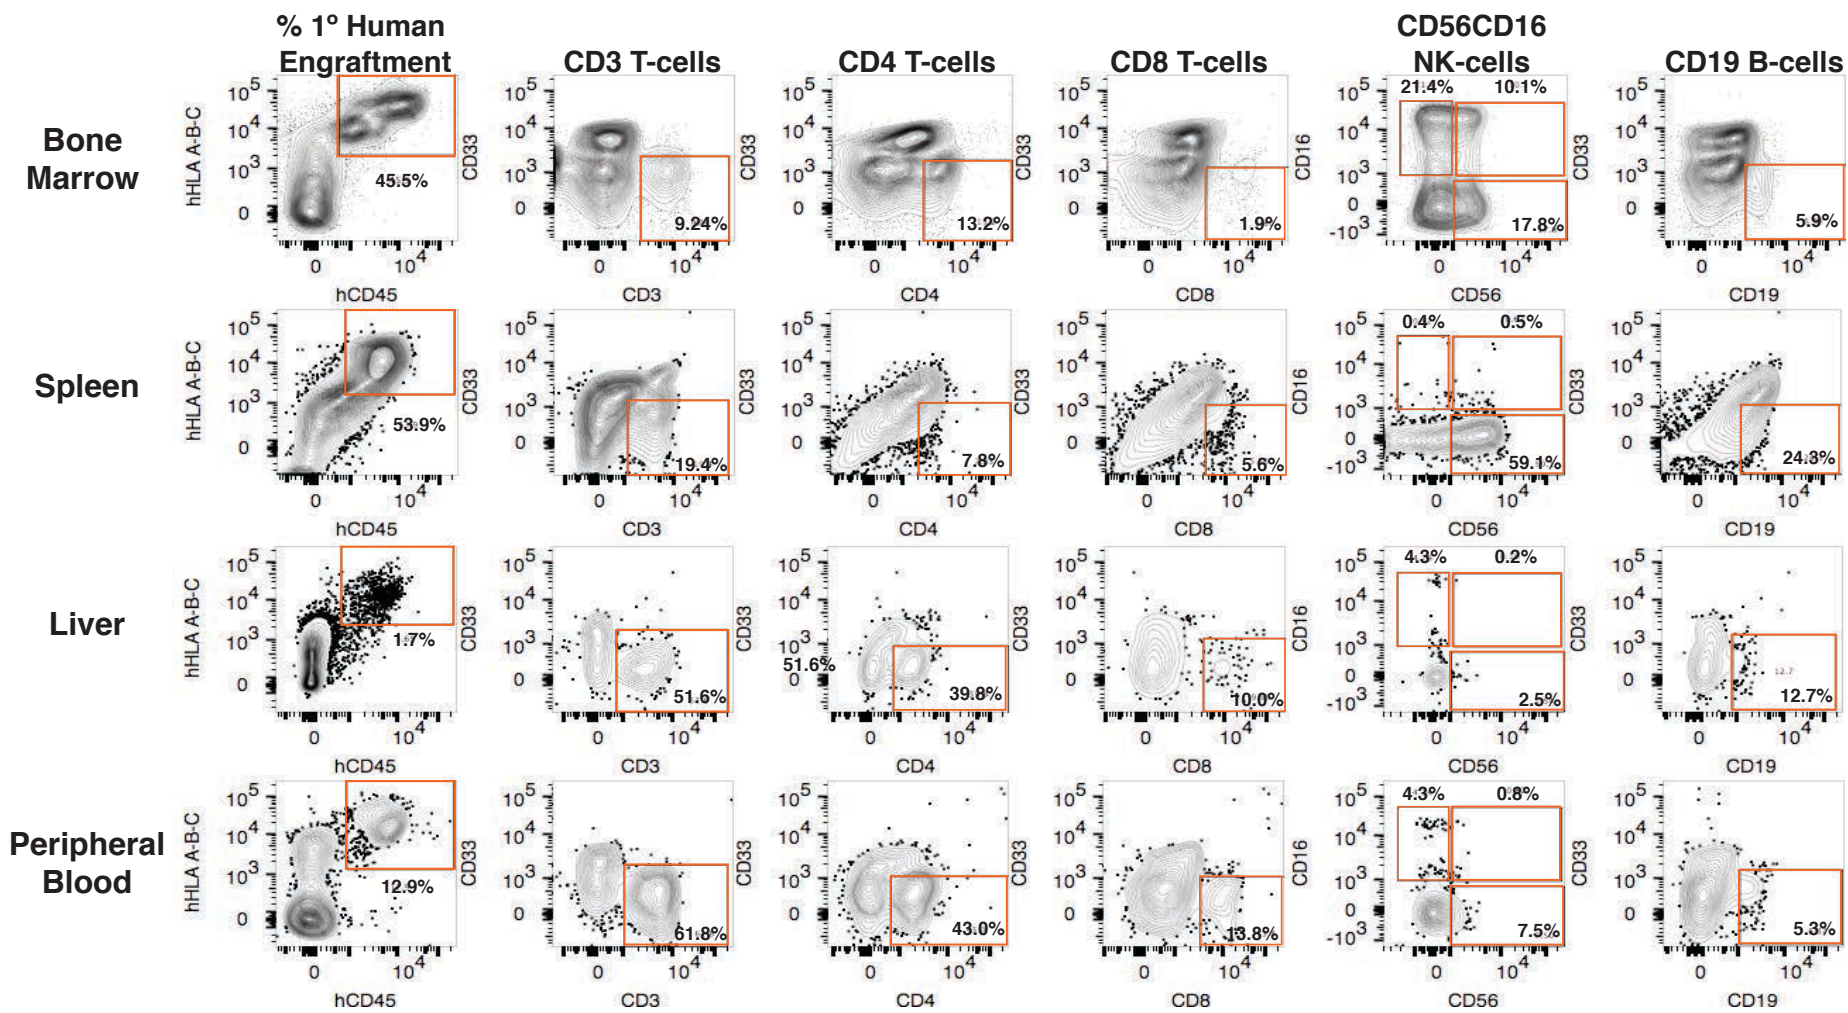

**Supplementary Figure 8.** Representative FACS plots for lymphoid lineage analysis at week 16 post intra-hepatic (IH) primary (1°) engraftment of IL2RG targeted CD34<sup>+</sup> HSPCs into new born NSG mice. Analysis is shown from a mouse with high (45.5%) human engraftment levels (hCD45<sup>+</sup> hHLA-ABC<sup>+</sup>).



Supplementary Figures

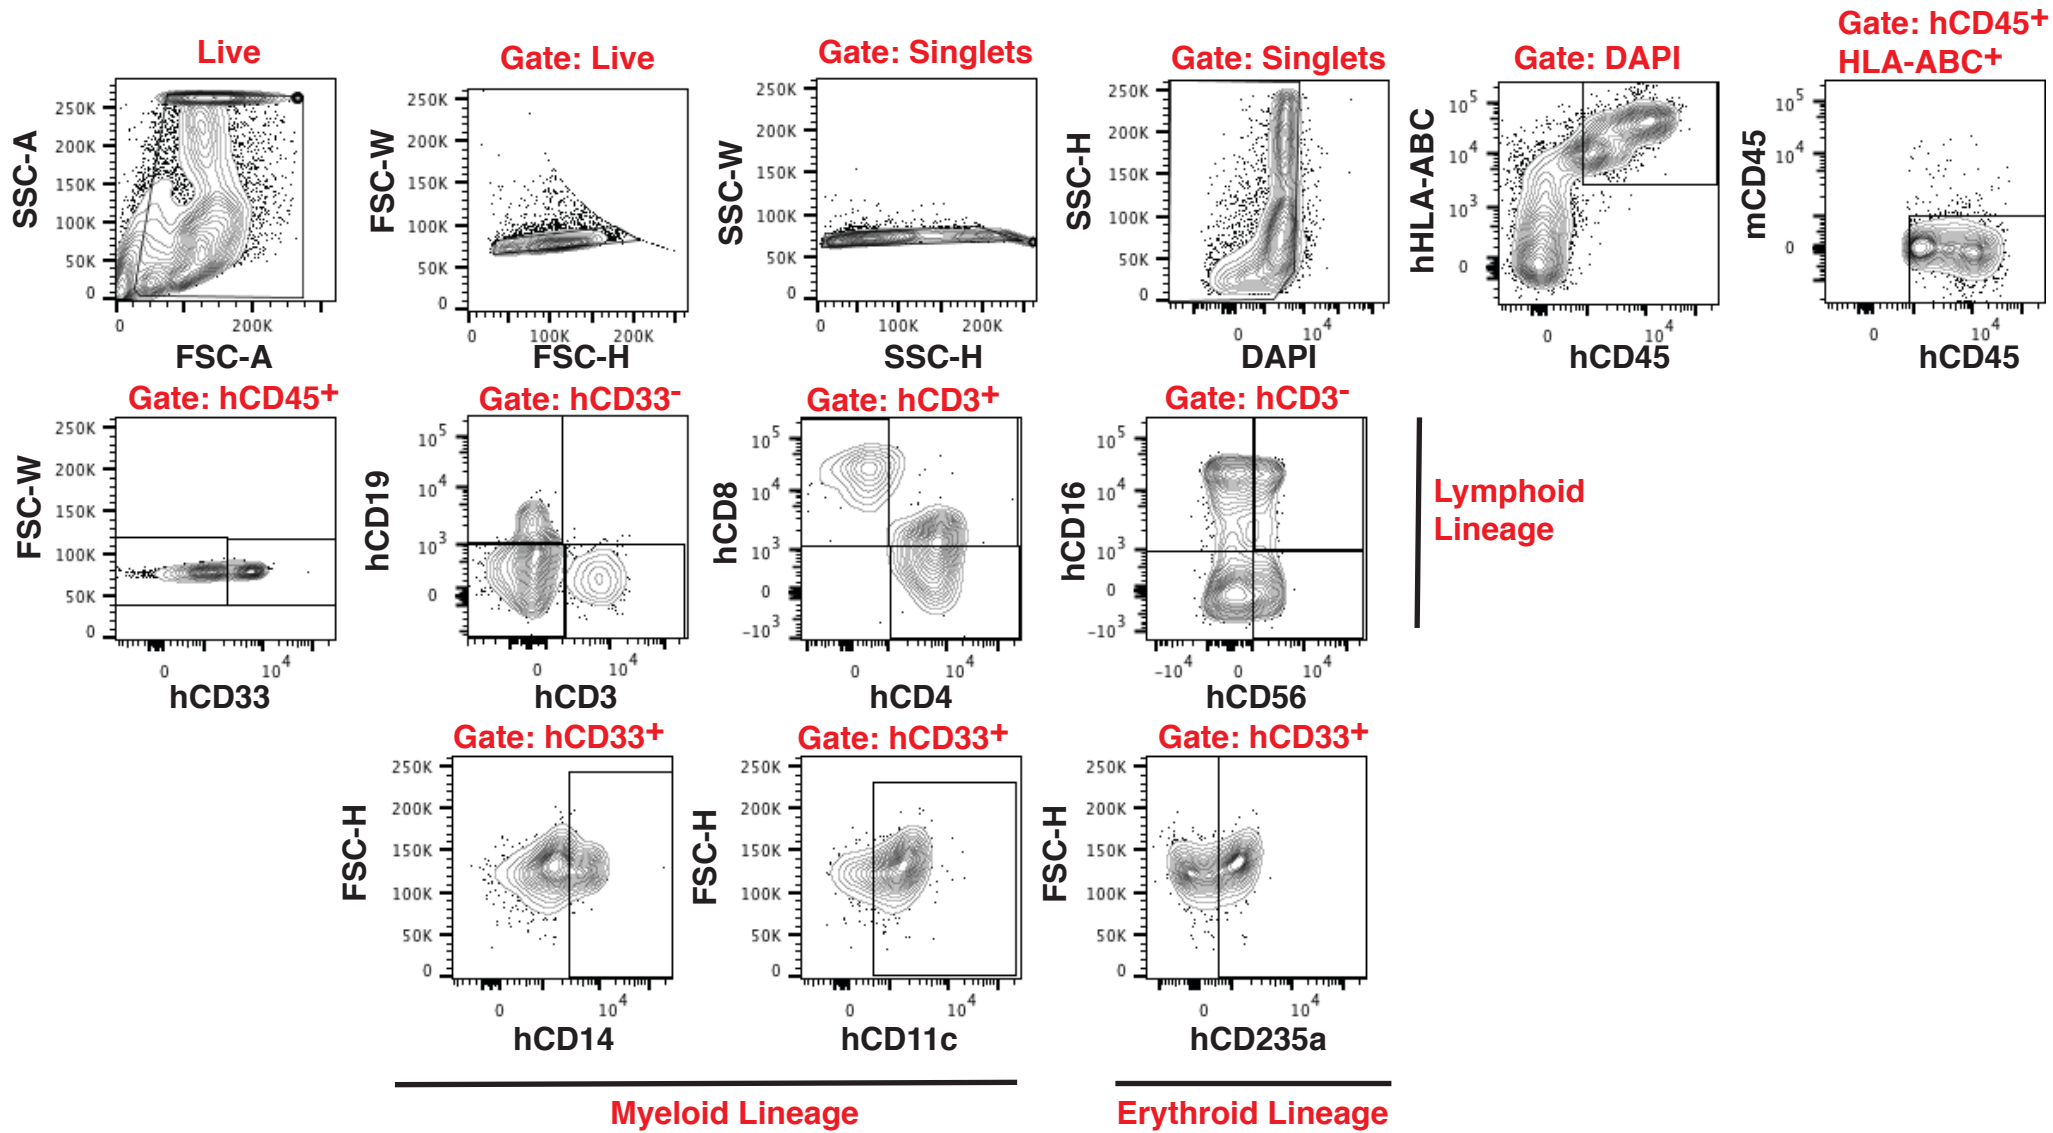

**Supplementary Figure 9.** Gating strategy for multilineage analysis. The following gating strategy was used to analyze multilineage development in vitro (Figure 1e) and in vivo (Figure 2c-f, Figure 3a-c, Figure 4e-g, Supplementary Figure 11, Supplementary Figure 12, Supplementary Figure 13, Supplementary Figure 14).

## Supplementary Figures

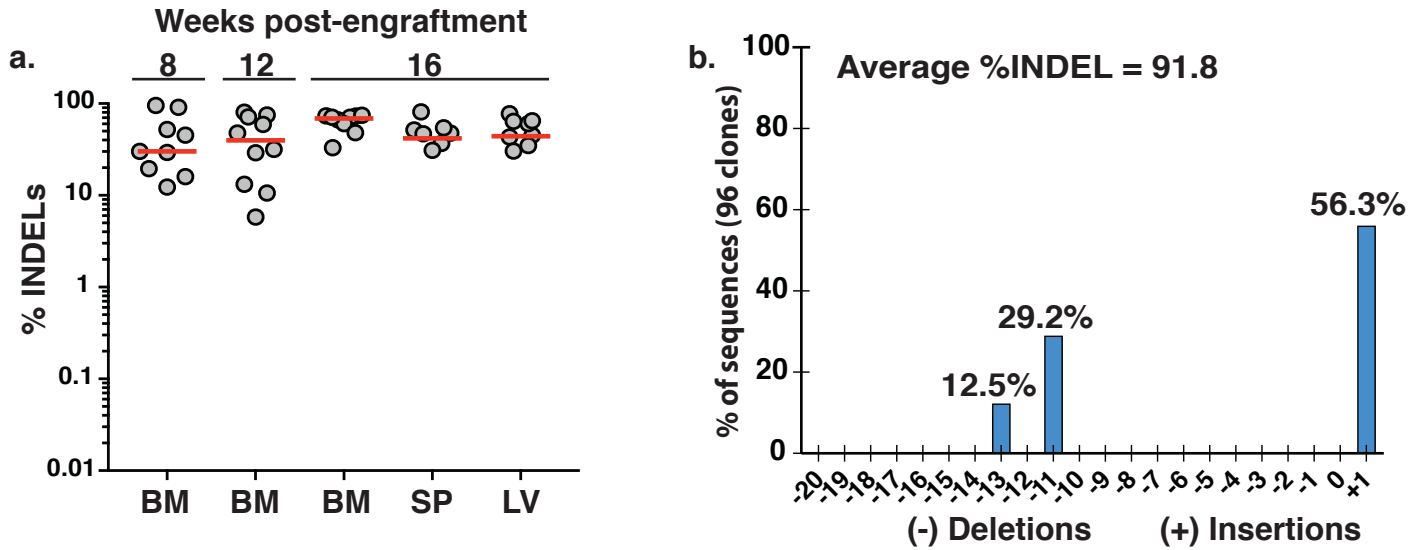

**Supplementary Figure 10.** On-target INDEL spectrum analysis of truncated (19nt) IL2RG sg-1 in CD34<sup>+</sup> HSPCs. **(a)**  $1.0 \times 10^5$  CD34<sup>+</sup> HSPCs derived from male, frozen mobilized PB source nucleofected with RNP system at 5:1 molar ratio. Percent INDELS determined by TIDE analysis at 8, 12 and 16 weeks post 1<sup>o</sup> IH engraftment into NSG pups. **(b)** INDEL spectrum characterization generated by truncated 19nt IL2RG sg-1 at day 4-post nucleofection of male derived CD34<sup>+</sup> HSPCs. Analysis was carried out at clonal level: 96 clones obtained from TOPO cloning bulk RNP sample. IL2RG alleles obtained from each clone were sequenced and their INDELS' distribution determined by TIDE analysis.

Supplementary Figures

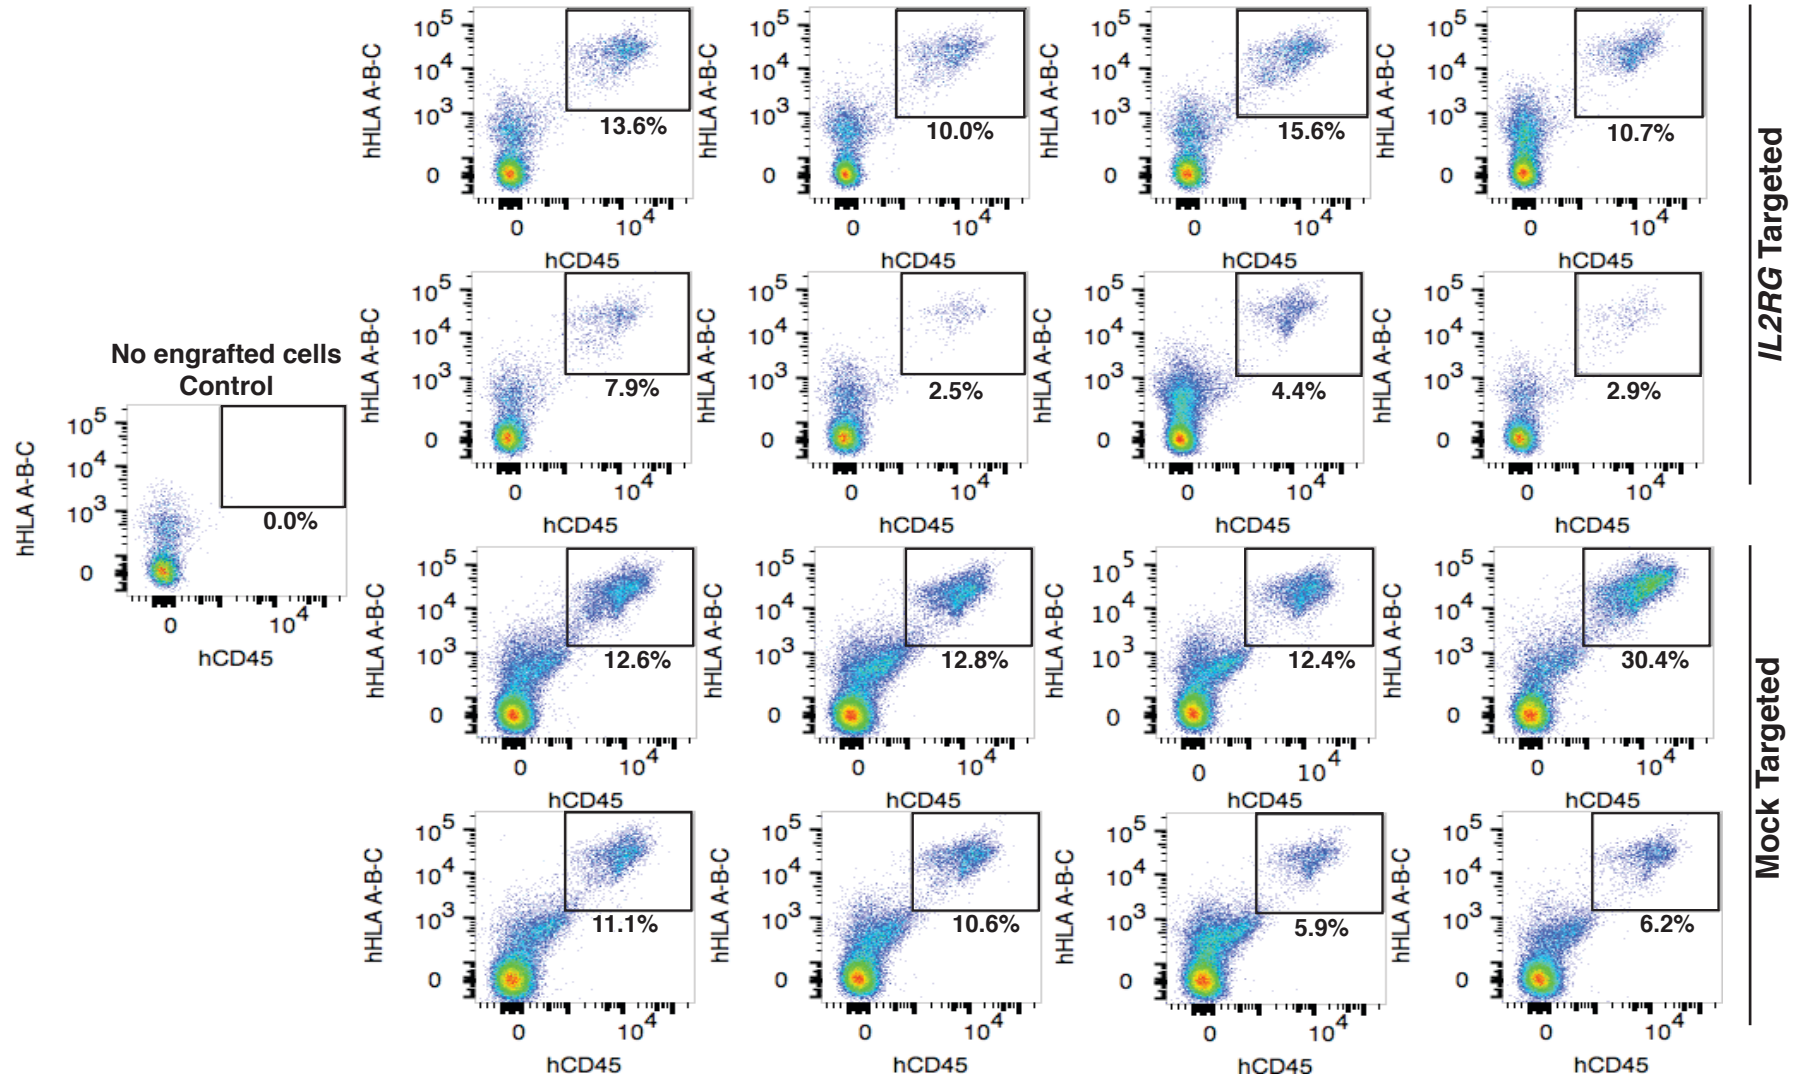

**Supplementary Figure 11.** FACS plots of secondary (2°) human engraftment levels (hCD45<sup>+</sup> hHLA-ABC<sup>+</sup>). Secondary engraftment was carried out from total BM derived from primary (1°) IH IL2RG and mock targeted CD34<sup>+</sup> HSPCs. BM, bone marrow.

## Supplementary Figures

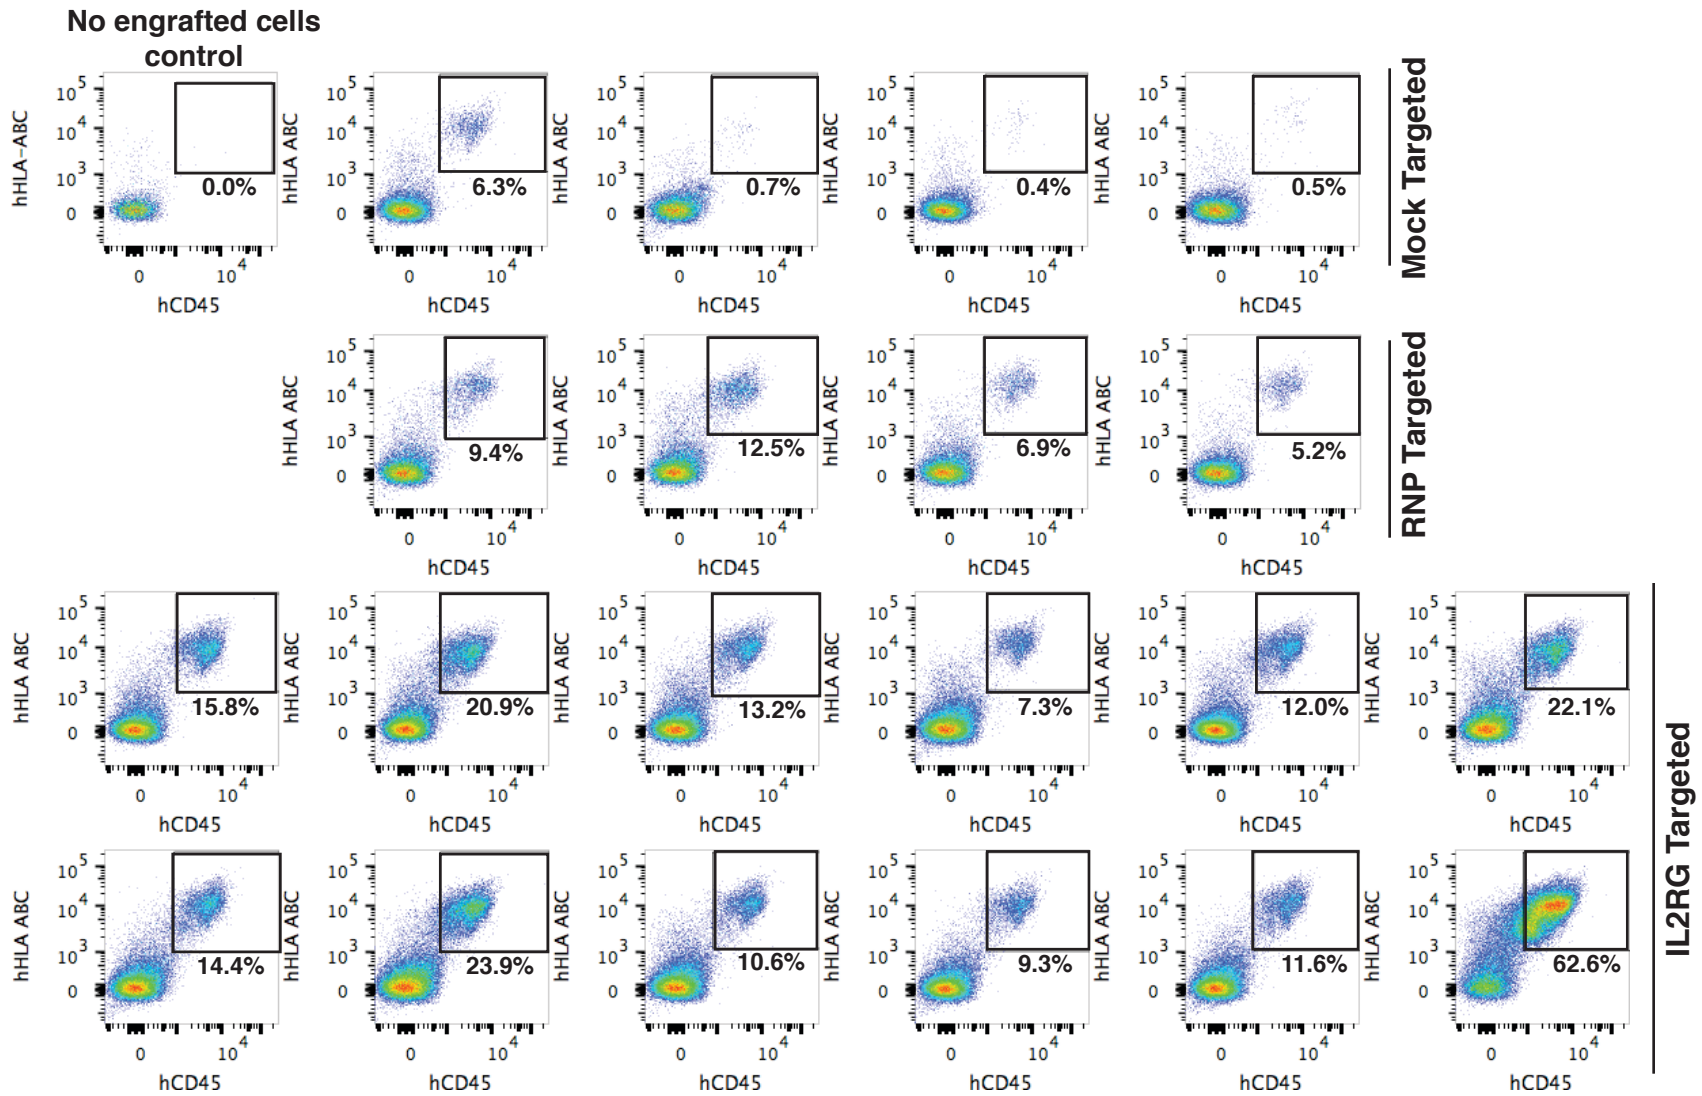

**Supplementary Figure 12.** FACS plots of 2° human engraftment levels (hCD45<sup>+</sup> hHLA-ABC<sup>+</sup>) from total BM of mice injected IF with IL2RG or mock targeted CD34<sup>+</sup> HSPCs. 5 x 10<sup>5</sup> purified CD34<sup>+</sup>HSPCs from total BM of mock or IL2RG targeted engrafted mice were injected IF into sub-lethally irradiated adult NSG mice. The observed low levels of engraftment in 3 out of 4 mice that received mock treated cells were due to fluid backflow during the IF injection procedure. IF: intra-femoral.

## Supplementary Figures

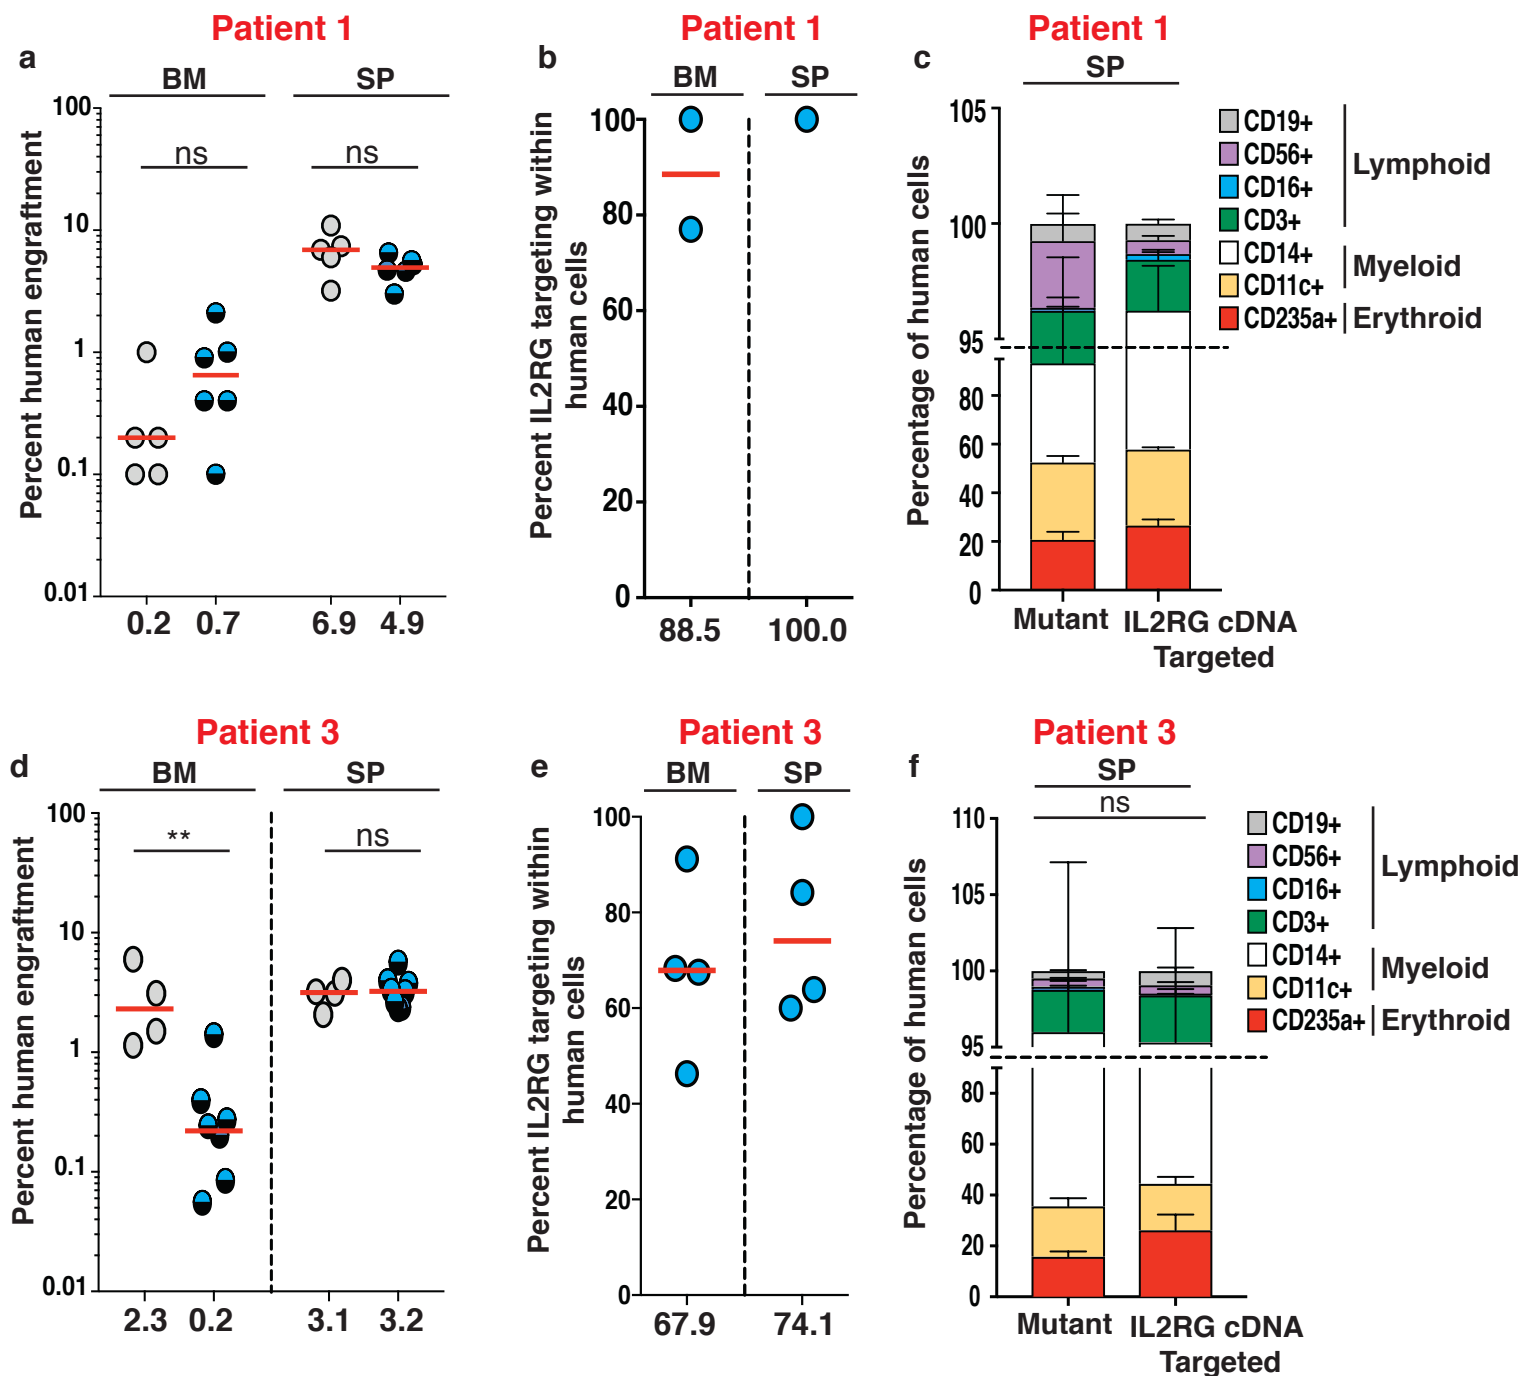

**Supplementary Figure 13.** Primary human engraftment of SCID-X1 patient derived CD34<sup>+</sup> HSPCs. (a) Human engraftment of mutant or IL2RG targeted HSPCs in bone marrow (BM, n = 5) or spleen (SP, n = 6) 20 weeks after transplant (median plotted). (b) ddPCR quantification of levels of IL2RG codon-optimized cDNA present in BM (n=2) and SP (n=1) samples. (c) Percent composition of lymphoid, myeloid and erythroid present in SP 20 weeks post-transplant. (d) Same as (a) using SCID-X1 patient 3 derived CD34<sup>+</sup> HSPCs mutant cells (n = 4) and IL2RG targeted cells (n=7) 17 weeks after transplant. Multiple t-test, Holm-Sidak test, median plotted. (e) Same as (b), n = 4. (f) Same as (c) \*\*p-value = 0.0073, ns, not significant.

Supplementary Figures

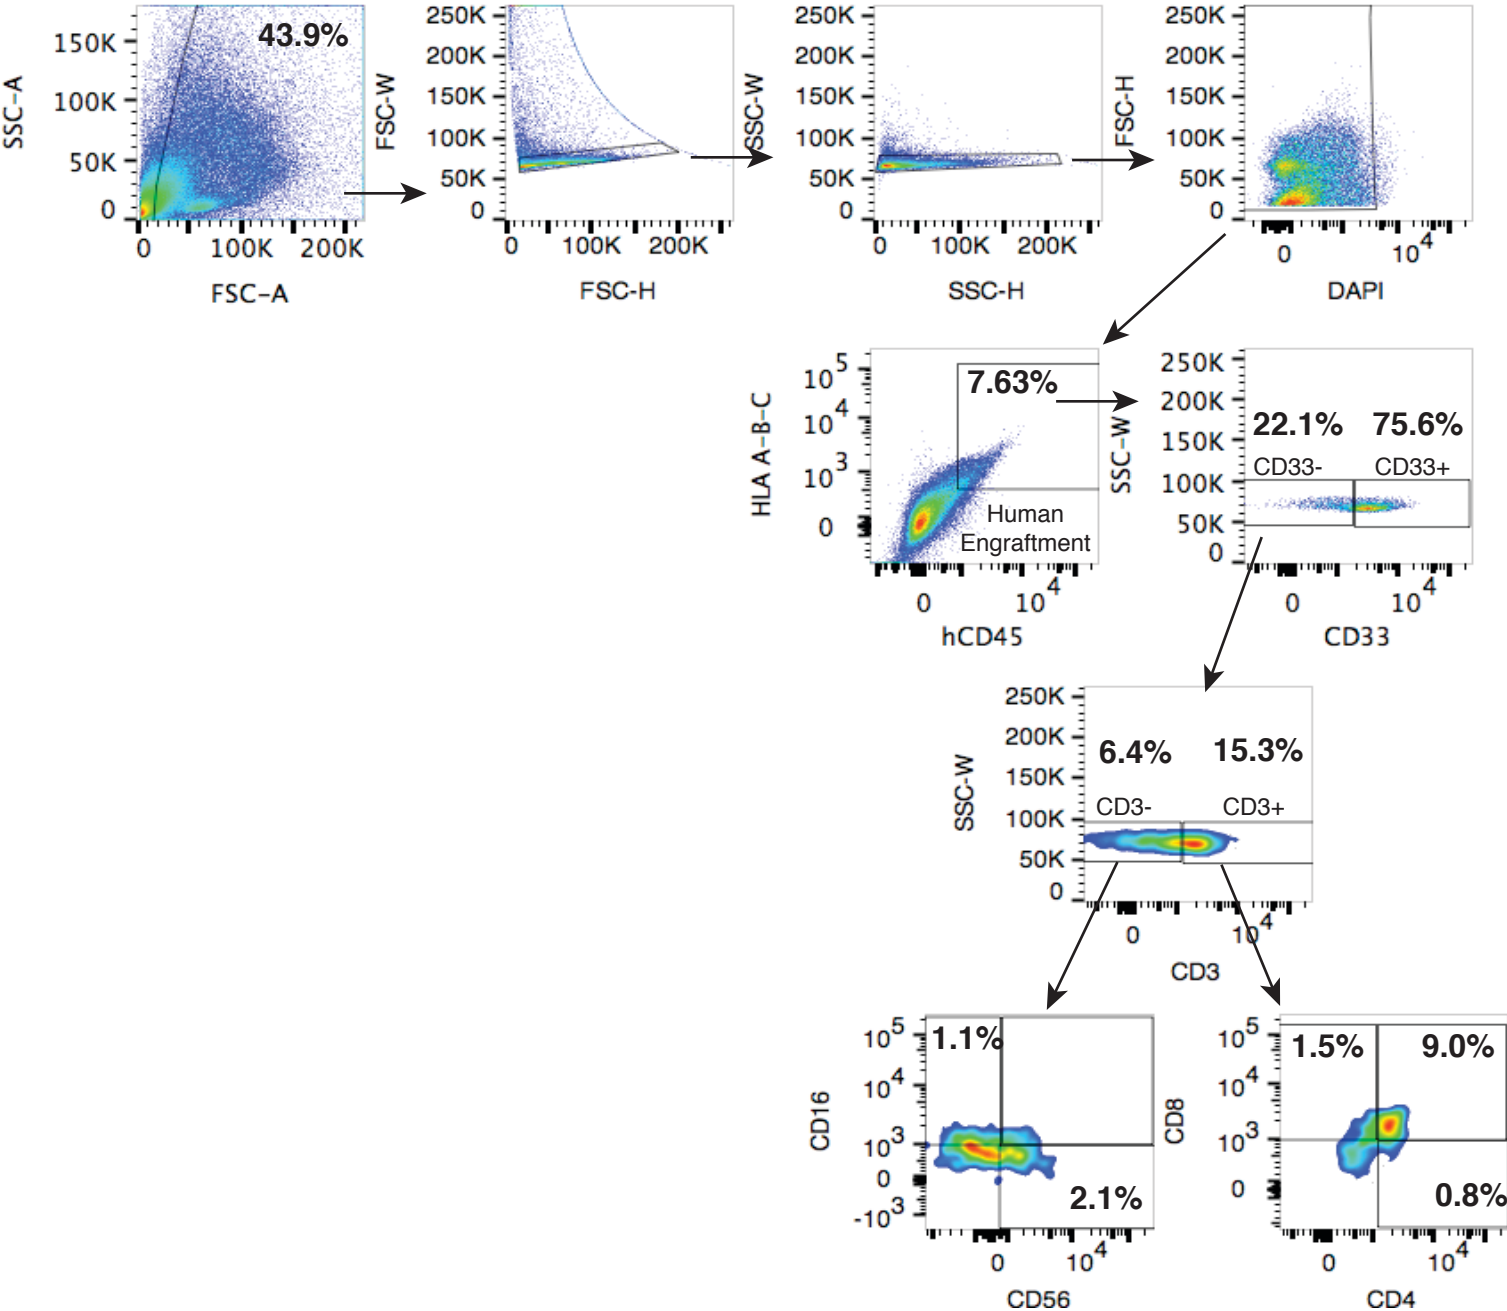

**Supplementary Figure 14.** Lymphoid lineage analysis of IL2RG cDNA targeted SCID-X1 patient 2 derived CD34<sup>+</sup>HSPCs. Representative FACS analysis of spleen sample derived from one NSG mouse at week 16 post engraftment with IL2RG cDNA targeted mobilized PB CD34<sup>+</sup>HSPCs. PB, peripheral blood.

Supplementary Figures

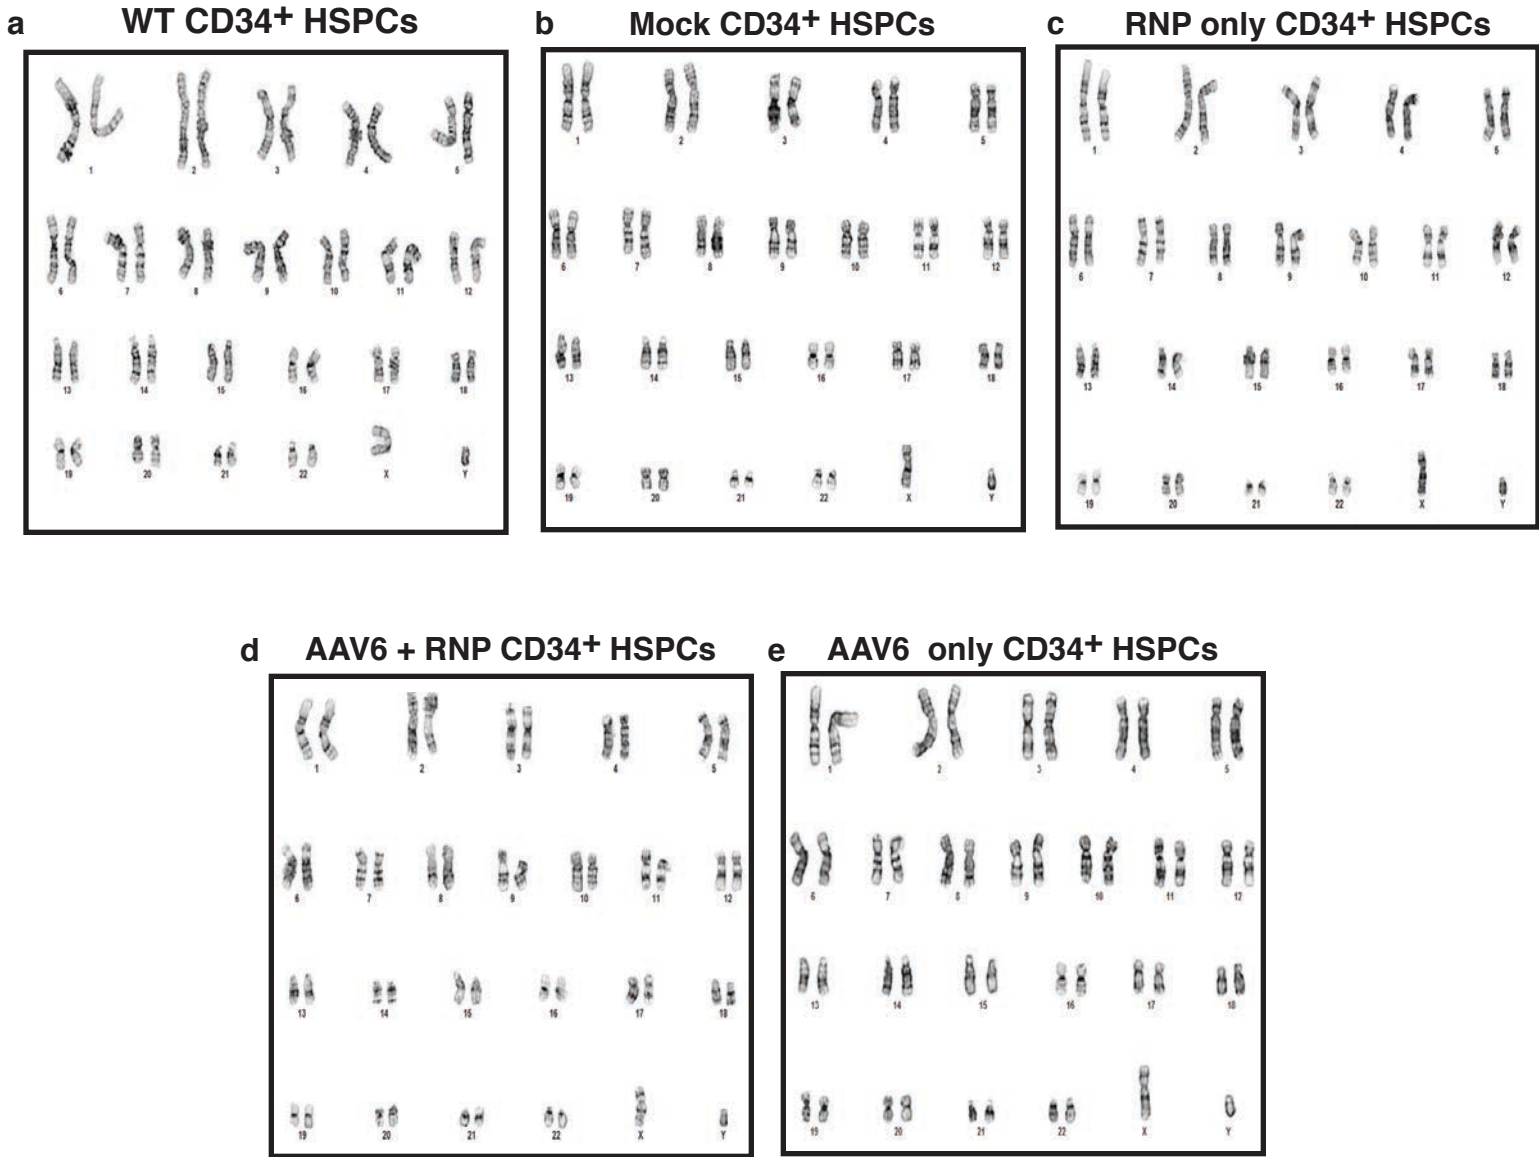

**Supplementary Figure 15.** Karyotype analysis of IL2RG cDNA genome edited and genome targeted cord blood derived CD34<sup>+</sup> HSPCs.  $5.0 \times 10^5$  cells were nucleofected at day 2 post ex-vivo cell culturing with RNP at 5:1 molar ratio. Conditions (d) and (e) received rAAV6 with -tNGFR IL2RG clinical donor at an MOI of 200,000 vgc/ul. Day 2 post transduction, cells were collected and prepared the same day for karyotype analysis. 20 cells were analyzed per condition. Conditions (c) and (d) and conditions (d) and (e) show that a combined 40/40 cells treated with RNP or with rAAV6, respectively did not produced cells with chromosomal abnormalities. vgc: viral genome copies.

## Supplementary Figures

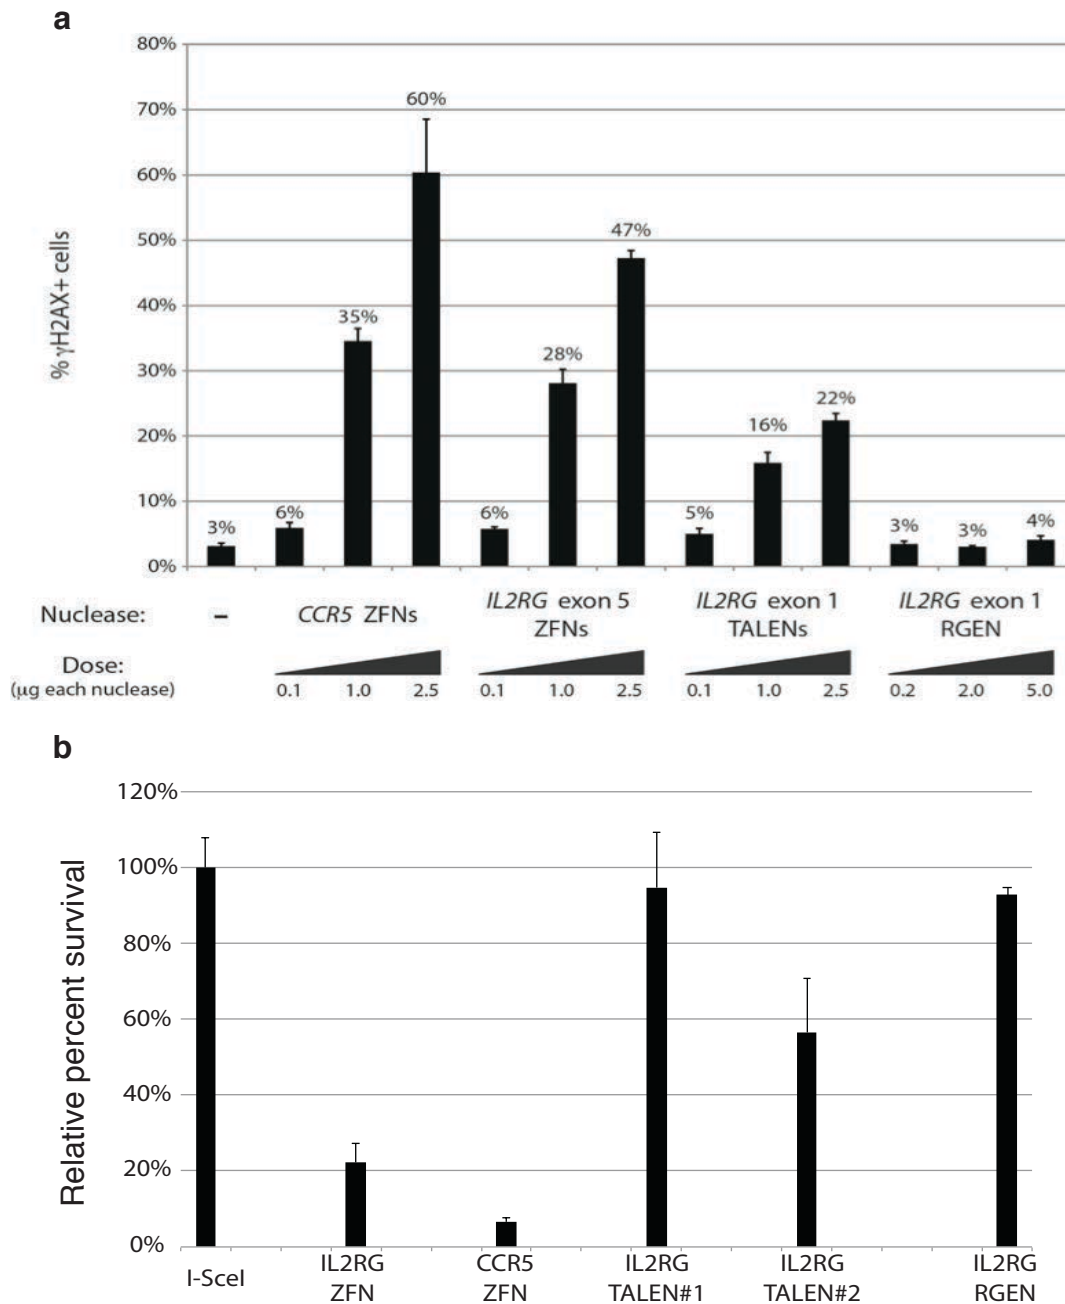

**Supplementary Figure 16.** Genotoxicity of IL2RG exon 1 TALENs, IL2RG exon 5 ZFNs, CCR5 ZFNs, and an IL2RG exon 1 RGEN (CRISPR-Cas9). **(a)**  $\gamma$ H2AX assay. Genotoxicity assay measuring DNA damage induced by different classes of engineered nucleases by assessing the phosphorylation of histone H2AX, a marker of DSB formation, in K562 cells. Percentage  $\gamma$ H2AX<sup>+</sup> cells was measured by flow cytometry 48h post-nucleofection. **(b)** Relative cell survival assay. Levels of genotoxicity induced by different classes of engineered nucleases in 293T cell line. Cells were nucleofected with GFP plasmid DNA and genome wide off-target activity of each nuclease was determined by FACS analysis as percent GFP<sup>+</sup> cells relative to I-SceI control. Bars: n = 3, mean  $\pm$  s.d.



Table S1 – sgRNA Guides sequence for IL2RG exon 1

| sgRNA Guide ID | sgRNA Guide Sequence       | PAM sequence |
|----------------|----------------------------|--------------|
| <b>sgRNA 1</b> | 5' TGGTAATGATGGCTTCAACA 3' | TGG          |
| <b>sgRNA 2</b> | 5' GGGCAGCTGCAGGAATAAGA 3' | GGG          |
| <b>sgRNA 3</b> | 5' AGGGATGTGAATGGTAATGA 3' | TGG          |
| <b>sgRNA 4</b> | 5' TTCAGCCCCACTCCCAGCAG 3' | GGG          |
| <b>sgRNA 5</b> | 5'ATTCTGCAGCTGCCCTGC 3'    | TGG          |
| <b>sgRNA 6</b> | 5' CGACAATTCTGACGCCCAAT 3' | GGG          |
| <b>sgRNA 7</b> | 5' AGCTGCCCTGCTGGGAGTG 3'  | GGG          |

Table S2 – Primers and probes for ddPCR based assay

| Primer Name           | Primer Sequence                     | Amplicon size (bp) |
|-----------------------|-------------------------------------|--------------------|
| ddPCR-cDNA-F          | 5' GGGTGACCAAGTCAAGGAAG 3'          | 499                |
| ddPCR-cDNA-R          | 5' GATGGTGGTATTCAAGCCGA 3'          |                    |
| ddPCR-cDNA-Probe      | 5' CAAGCGCCATGTTGAAACCCAGCCTGCCC 3' |                    |
| ddPCR-Reference-F     | 5' GGGAAAGGTAAAAGTGGCAAC 3'         | 483                |
| ddPCR-Reference-R     | 5' GGGCACATATACAGCTGTCT 3'          |                    |
| ddPCR-Reference-Probe | 5' CCTCGCCAGTCTCAACAGGGACCCAGC 3'   |                    |
| ddPCR-GFP-F           | 5' AAGGGGGAGGATTGGGAAG 3'           | 502                |
| ddPCR-GFP-R           | 5' TCAGAAGGAGGAGGCCAAG 3'           |                    |
| ddPCR-GFP-Probe       | 5' GCATGCTGGGGATGCGGTGGGC 3'        |                    |
